# Supplementary material
Source: publisher figshare collection journal article supplement (https://tandf.figshare.com/ndownloader/files/20998704)
Supplement: Supplementary file 1 [file 20998704]

## 1. Supplementary material

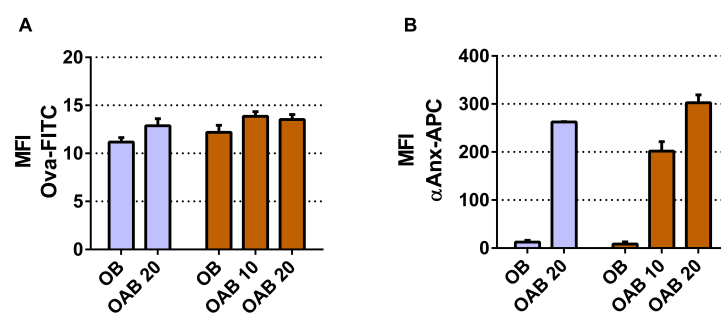

**SFig. 1. Bead coating controls.** Bead coating was analyzed by FC. Proteins were detected directly (Ova-FITC) or by staining with a fluorescent antibody ( $\alpha$ Anx-APC). Different bar colors indicate different bead charges

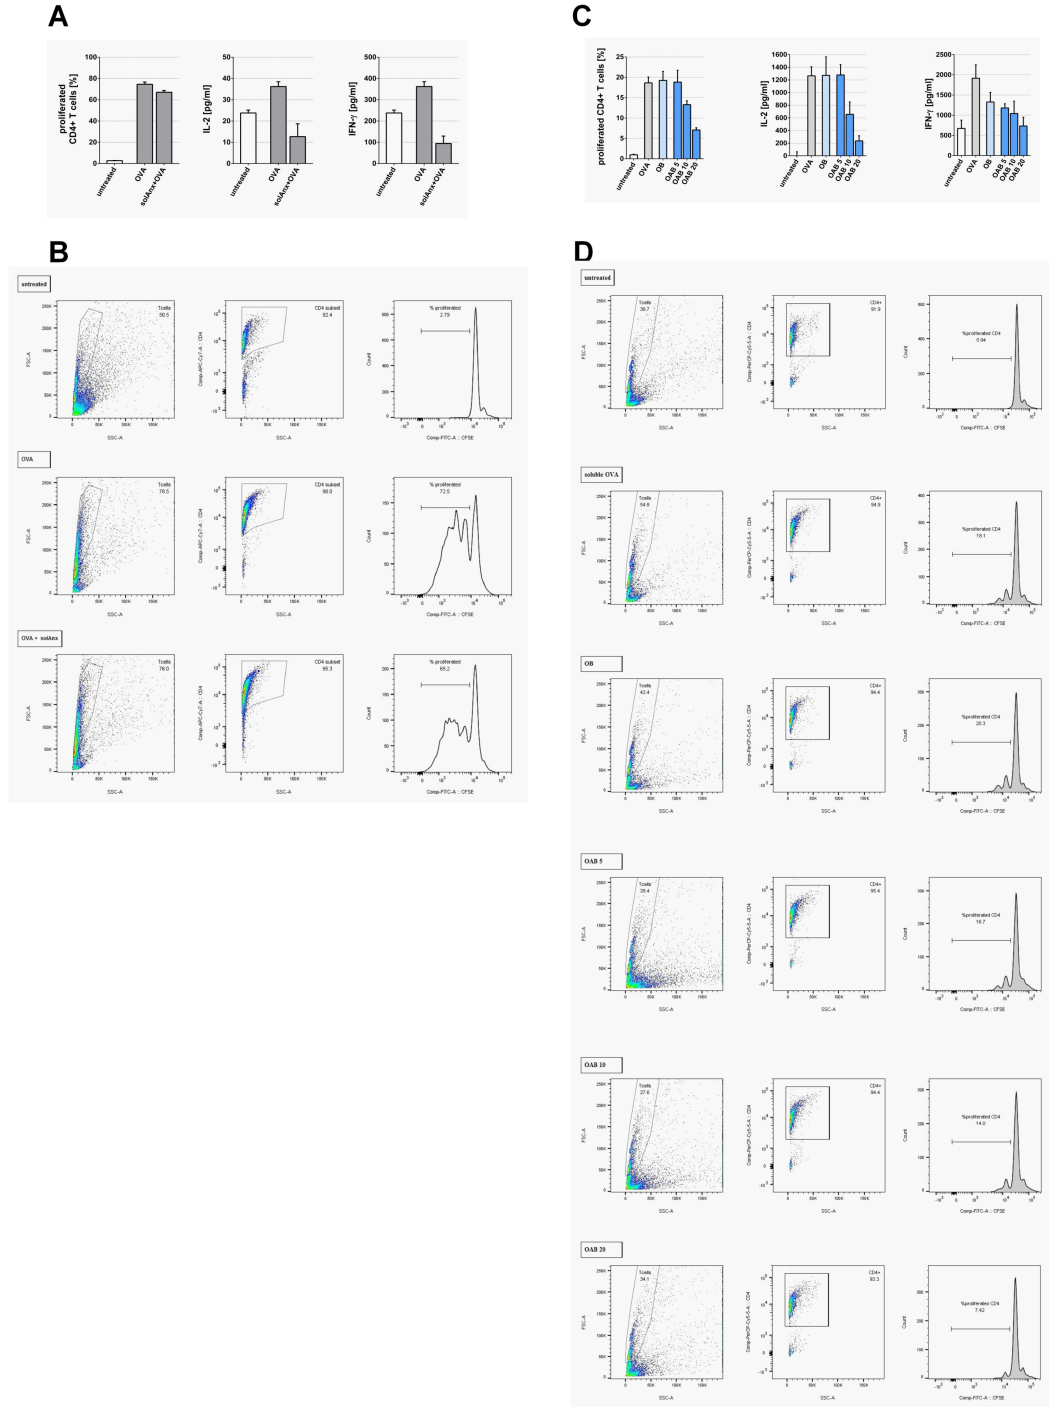

**SFig. 2. Exemplary flow cytometry plots of attenuated T cell responses.** BMDC were incubated with beads coated with OVA (OB) or OVA and Anx (OAB) and additionally stimulated with CpG. CFSE-labeled OT-II T cells were added and co-cultured for 5 days before the T cells were harvested to analyze proliferation by FC. Additionally, cytokine secretion was analysed by ELISA. (A-B) exemplifies one individual experiment (measured in triplicates) from the summarized data shown in Fig1A-C. (C-D) exemplifies one individual experiment (measured in triplicates) from the summarized data shown in Fig1G-H.

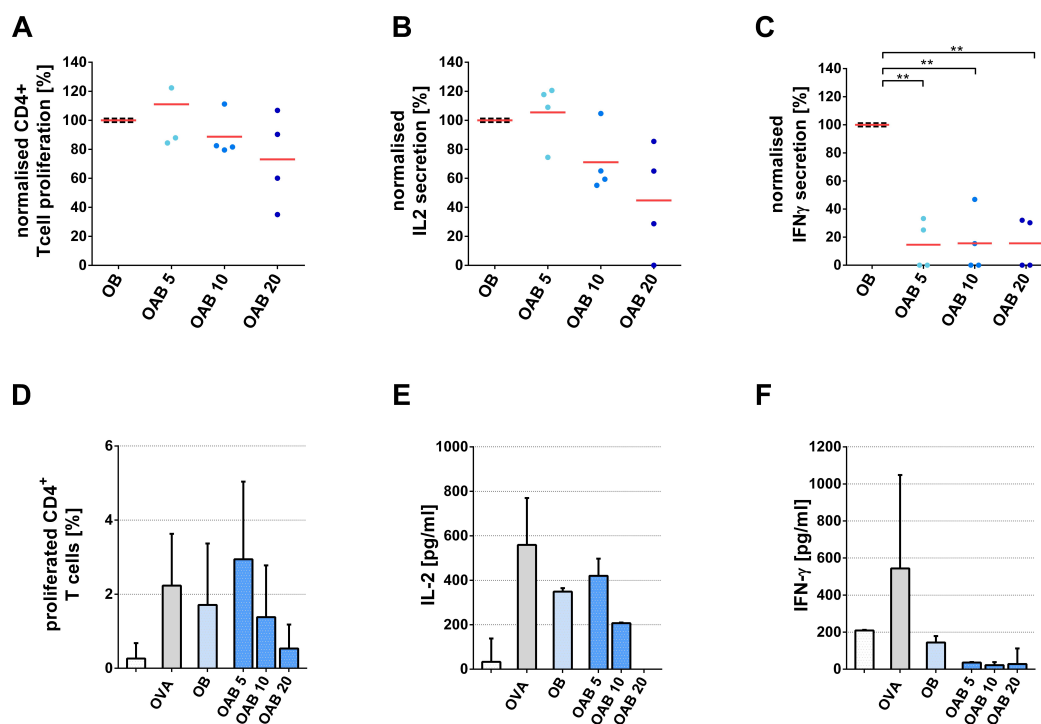

**SFig. 3. Treatment of unstimulated BMDC with particulate Anx attenuates T cell responses.** BMDC were incubated with beads coated with OVA (OB) or OVA and Anx (OAB). Only if indicated, the cells were additionally stimulated with CpG. CFSE-labeled OT-II T cells were added and co-cultured for 5 days before the T cells were harvested to analyze proliferation by FC. Additionally cytokine secretion was analyzed by ELISA. (A-C) T cell responses to ascending bead concentrations of 4 independent experiments. Dots represent individual experiments. (D-F) exemplifies the raw data of one individual experiment (measured in triplicates) from the summarized data shown in A-C and Fig1G-I.

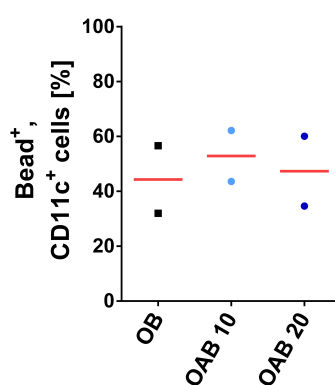

**SFig. 4. Bead uptake is not influenced by different amounts of Anx.** BMDC were pre-treated with fluorescent beads [ $14 \times 10^6$ /ml] and stimulated with CpG. 2 days later, BMDC were harvested, stained for CD11c and their bead content was analyzed by FC.

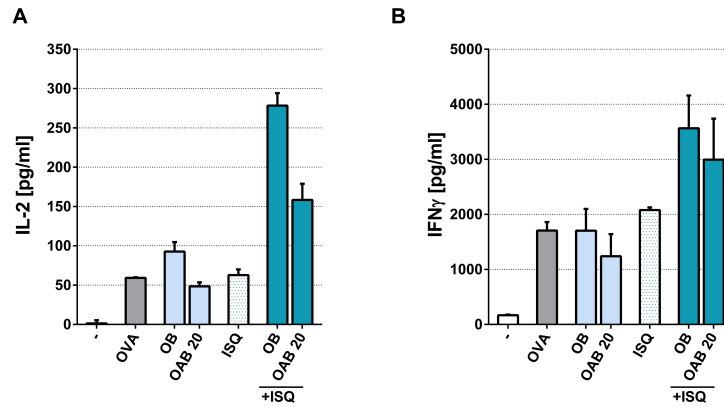

**SFig. 5. Exogenous ISQ increased cytokine secretion without affecting OAB-mediated inhibition.** BMDC were pre-treated with beads and CpG before they were co-cultured with OT-II T cells. Cytokine secretion was measured after 2 or 5 days of co-culture for IL-2 and IFN $\gamma$ , respectively. For the indicated conditions, ISQ [0,005  $\mu$ M] was added at least 30 min prior to the T cells. (A-B) exemplifies cytokine secretion without normalization of one individual experiment from the normalized and summarized data shown in Fig2E-F.

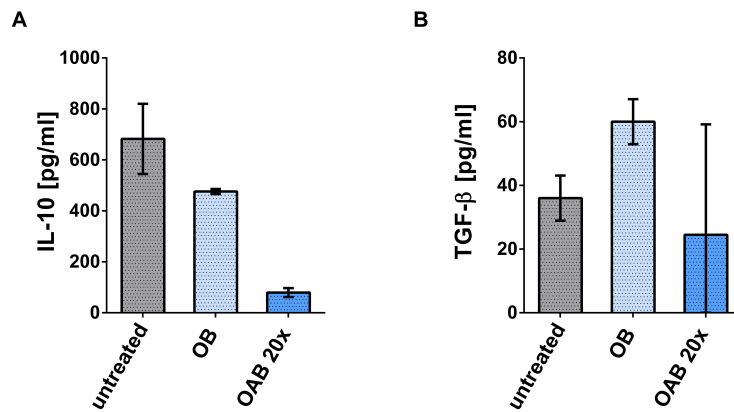

**SFig. 6. OT-II T cells produce limited amounts of IL-10 and TGF- $\beta$ .** BMDC were pre-treated with beads and CpG before they were co-cultured with OT-II T cells. Cytokine secretion was measured after 5 days of co-culture. (A) exemplifies the IL-10 secretion of one individual experiment from the summarized data shown in Fig4B. (B) exemplifies the TGF- $\beta$  secretion of one individual experiment from the summarized data shown in Fig4C.
